# Supplementary material
Source: PubMed Central journal article supplement (PMC1851037)
Supplement: pnas_0609915104_1.pdf [file pnas_0609915104_1.pdf]

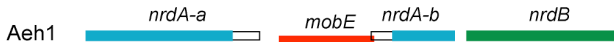

*nrdA-a* →

DNA: GTTAACTCGGCTACTCCGTACAAAGAGCCTATTTCGTATGGGTAATCTGTGCATCGAAATCGCGCTGCCGACAGTCCCTATGGGA  
 +1: V N S A T P Y K E P I R M G N L C I E I A L P T V P M G

DNA: AAGAAAGAAAAGATGTTGTTTAAAGTCAAAAAGTCCGAAGTTGATAAGTTCAAACCTTATGGTAGCGACGGATCAATATAAGTCT  
 +1: K K E K M L F K V K K S E V D K F K L M V A T D Q Y K S

*nrdA-1*

*rbs*

*mobE*

DNA: CTGAGATAC TAAAATTTGCACCCTCTAAATAGTCGTGTACGTTAAGAG ggtca AAATATGAATTATAAGAGAATACACGACTTA  
 +1: L R Y \*  
 +2: ----- M N Y K R I H D L

DNA: ATTATCAACAAATTTAAAAATTCGGAGATCTCCGGTTACAAAGAGAAACATCATATTATCCCAAGATGTATGGGAGGTGATGAT  
 +2: I I N K F K N S E I S G Y K E K H H I I P R C M G G D D

DNA: AGTGACGACAATTTGGTATATCTAACTGCTAAAGCACAC ..(501 nts).. AAAGAAACCGGAATCTCCAGATTTATTCTCAATAGG  
 +2: S D D N L V Y L T A K A H K E T G I S R F I L N R

*rbs*

*nrdA-2*

*mobE*

DNA: AggagaTTT TAGAGAAAATGATCGAACATGAAAGAATTTACGAAGTATACGAAGATGAAGAATATACCACGGTAGAAATTGAGGT  
 +2 R R F R E N D R T \*  
 +3: M I E H E R I Y E V Y E D E E Y T T V E I E

DNA: AGATGTTTCGGAAATAAGCCTTTGCACTTTAGCGGCGTATAATCTCGGCGCAATTGAGGGTTATGAAGACTTCCTAAACGTTGC  
 +3: V D V S E I S L C T L A A Y N L G A I E G Y E D F L N V
